# Supplementary material
Source: Springer Nature journal article supplement (https://www.springermedizin.de/resource/supplementary/12936_2008_652_MOESM6_ESM.pdf/9547920)

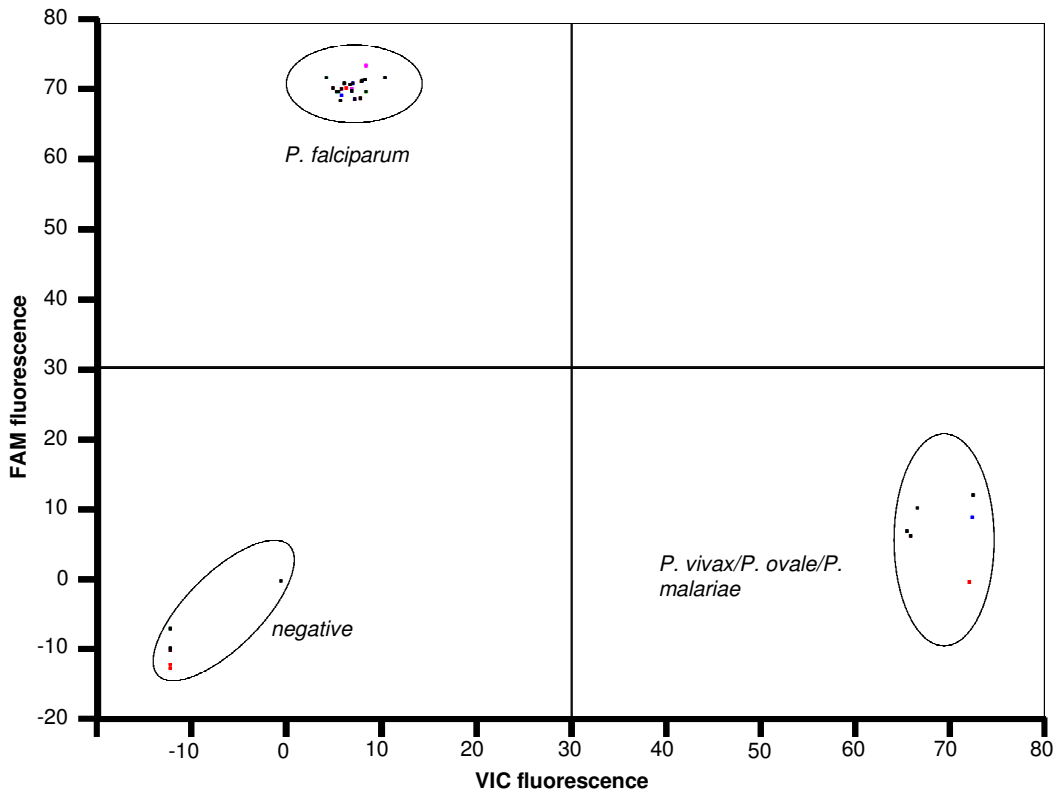

Supplement: MOESM6 [file 9547920]
